# Supplementary material for: MEK inhibitor mirdametinib promotes fracture healing in osteofibrous dysplasia RASopathy
Source: JCI journal article supplement (doi:10.1172/jci199048), 2026-02-26
Supplement: sd2 [file 2]

## Full unedited blot/gel for Figure 1A

### Blot1

Primary Ab:  
Rabbit tErk [cell signaling # 4695S (1:1000)] in  
5% BSA in TBST

Secondary Ab:  
Goat anti-rabbit (1:5000) in 5% milk TBST

### Blot2

Primary Ab:  
Rabbit pErk [cell signaling # 4370S (1:1000)]  
in 5% BSA in TBST

Secondary Ab:  
Goat anti-rabbit (1:5000) in 5% milk TBST

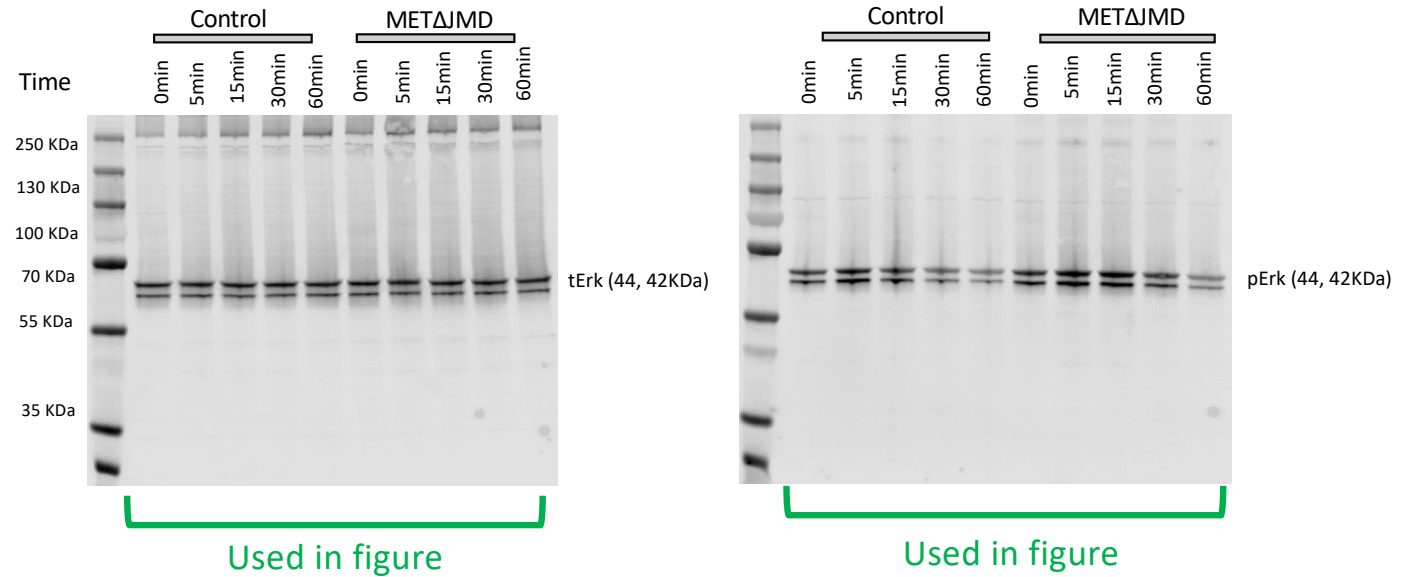

Expected product size:  
pErk/tErk: 44, 42KDa

## Full unedited blot/gel for Figure 1E

15ug protein loaded

### Blot1

#### Primary Ab:

Rabbit tERK [cell signaling # 4695S (1:1000)] in 5% BSA in TBST

#### Secondary Ab:

Goat anti-rabbit (1:5000) in 5% milk TBST

### Blot2

#### Primary Ab:

Rabbit pERK [cell signaling # 4370S(1:1000)] in 5% BSA in TBST

#### Secondary Ab:

Goat anti-rabbit (1:5000) in 5% milk TBST

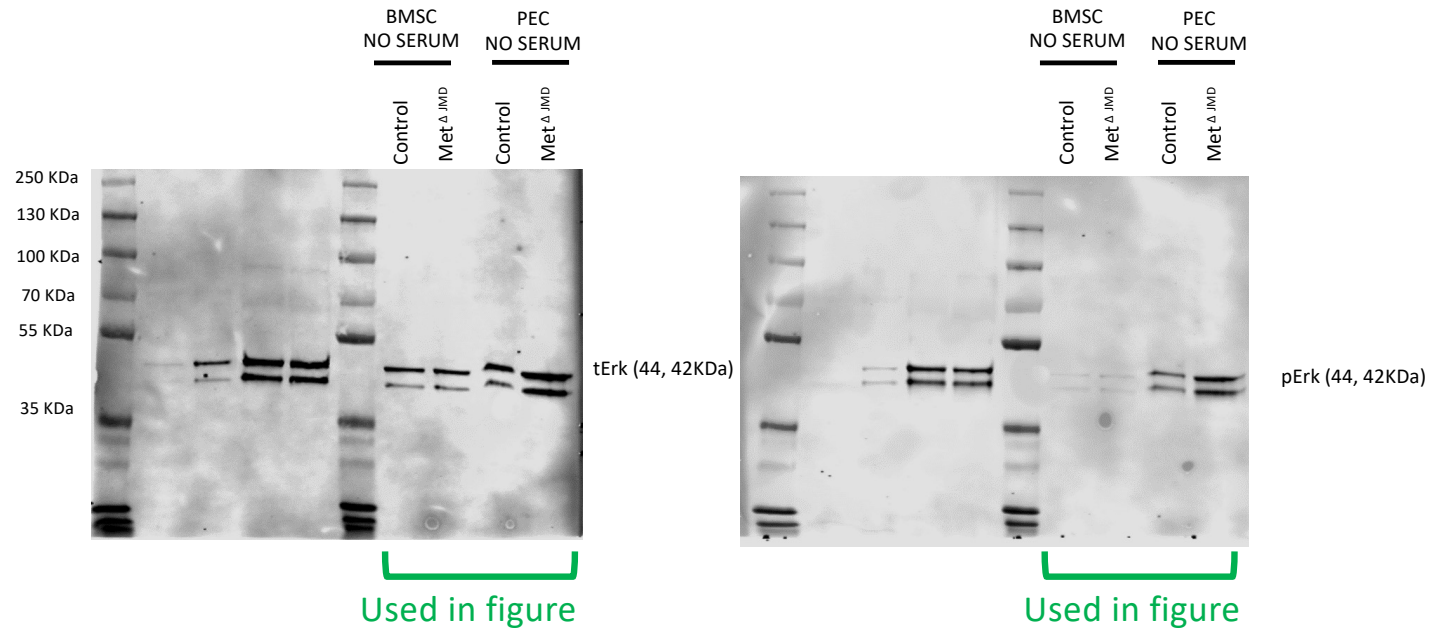

#### Expected product size:

pErk/tErk: 44, 42KDa

## Full unedited blot/gel for Figure 4B

15ug protein loaded

### Blot1

#### Primary Ab:

Rabbit tERK [cell signaling # 4695S (1:1000)] in 5% BSA in TBST

#### Secondary Ab:

Goat anti-rabbit (1:5000) in 5% milk TBST

### Blot2

#### Primary Ab:

Rabbit pERK [cell signaling # 4370S (1:1000)] in 5% BSA in TBST

#### Secondary Ab:

Goat anti-rabbit (1:5000) in 5% milk TBST

#### Expected product size:

pErk/tErk: 44, 42KDa

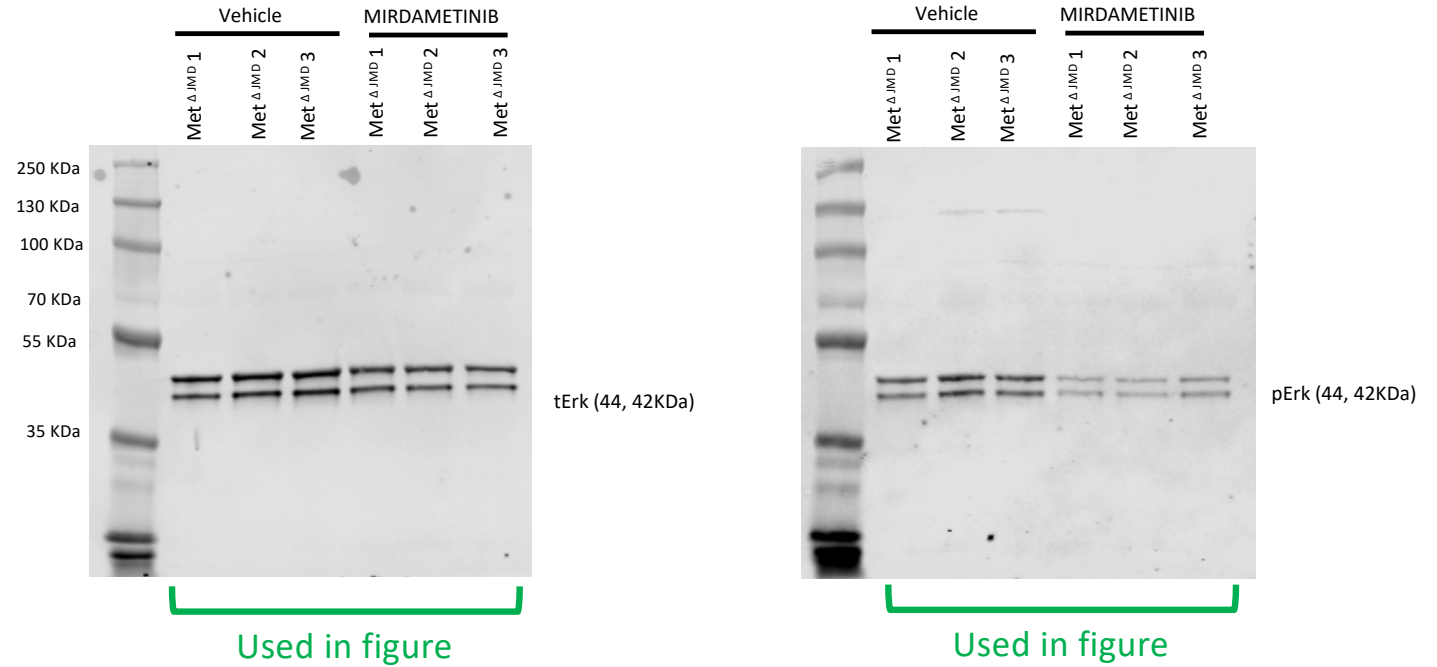

## Full unedited blot/gel for Figure 5A

8 ug protein loaded

### Blot1

#### Primary Ab:

Rabbit pERK [cell signaling # 4370S (1:1000)] in 5% BSA in TBST

#### Secondary Ab:

Goat anti-rabbit (1:10,000) in 5% milk TBST

### Blot2

#### Primary Ab:

Rabbit tERK [cell signaling # 4695S (1:2000)] in 5% BSA in TBST

#### Secondary Ab:

Goat anti-rabbit (1:10,000) in 5% milk TBST

#### Expected product size:

pERK/tERK: 42/44 kDa

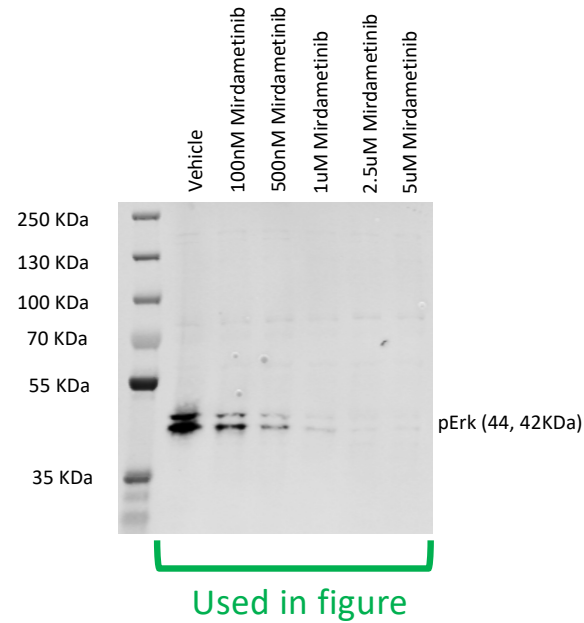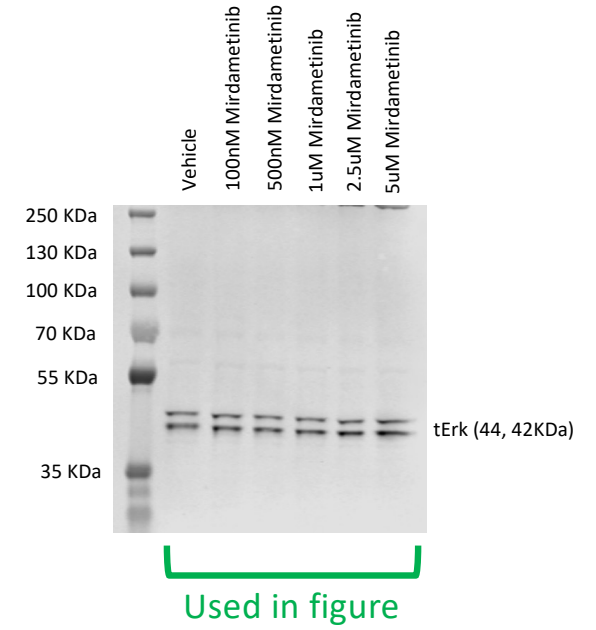

## Full unedited blot/gel for Figure S5A

15ug protein loaded

### Blot1

#### Primary Ab:

Rabbit tERK cell signaling # 4695S(1:1000) in 5% BSA in TBST

#### Secondary Ab:

Goat anti-Rabbit (1:5000) in 5% milk TBST

### Blot2

#### Primary Ab:

Rabbit pERK [cell signaling # 4370S (1:1000)] in 5% BSA in TBST

#### Secondary Ab:

Goat anti-rabbit (1:5000) in 5% milk TBST

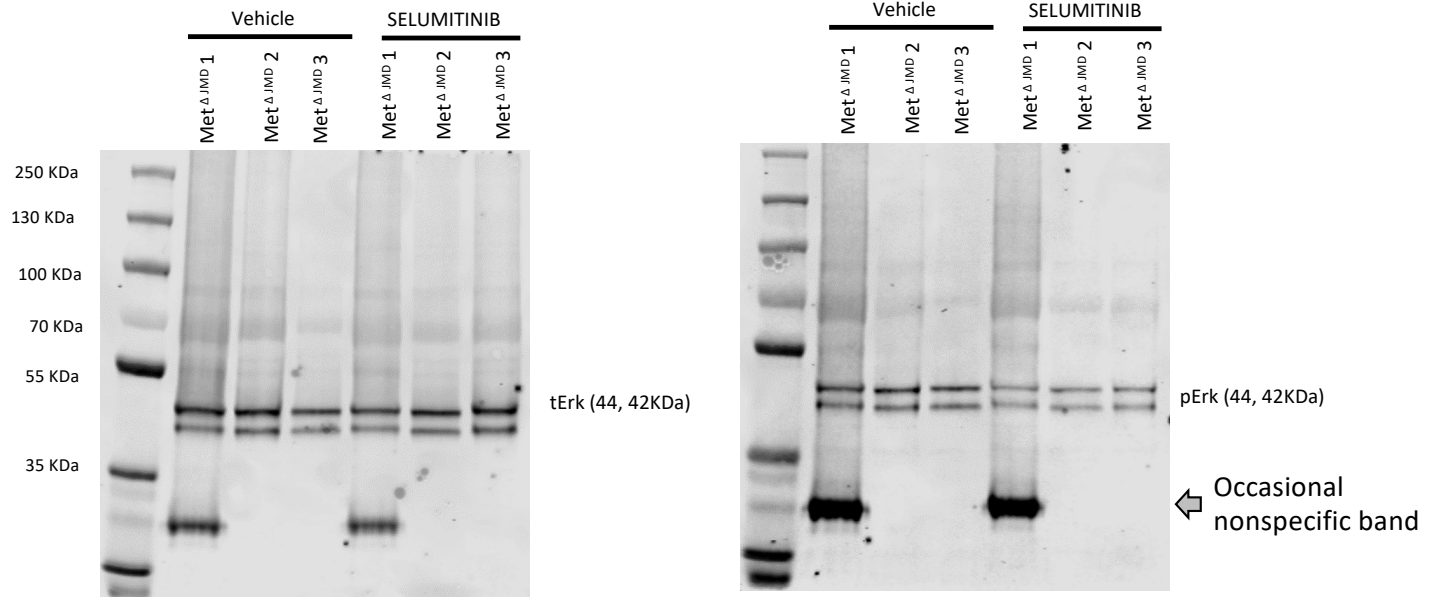

#### Expected product size:

pErk/tErk: 44, 42KDa
